# Supplementary material for: Gene flow and genetic structure of Bactrocera carambolae (Diptera, Tephritidae) among geographical differences and sister species, B. dorsalis, inferred from microsatellite DNA data
Source: Zookeys. 2015 Nov 26;(540):239–72. doi: 10.3897/zookeys.540.10058 (PMC4714072; doi:10.3897/zookeys.540.10058)
Supplement: Supplementary material 1 — Component data at the five successive thresholds used to illustrate Figure 4 [file zookeys-540-239-s001.xls]

## Sheet: Sheet1
Supplementary file 1: Table 1 Component data at the five successive thresholds used
to illustrate the structure of the subset of B. carambolae populations illustrated in Figure 4.
The highest Betweenness-centrality is highlighted in blue.
Node	Degree	Clustering	betweeness	population size
Thr 1 (Dp = 0.90)
	Component 0 : Size = 7 nodes
PR	6	1	0	33
DK	6	1	0	21
JK	6	1	0	26
PK	6	1	0	31
NS	6	1	0	28
NT	6	1	0	29
DP	6	1	0	17
Thr 2 (Dp = 0.52)
	Component 0 : Size = 7 nodes
PR	1	0	0	33
DK	5	1	0	21
JK	6	0.67	5	26
PK	5	1	0	31
NS	5	1	0	28
NT	5	1	0	29
DP	5	1	0	17
Thr 3 (Dp = 0.40-0.50)
	Component 0 : Size = 6 nodes
DK	5	1	0	21
JK	5	1	0	26
PK	5	1	0	31
NS	5	1	0	28
NT	5	1	0	29
DP	5	1	0	17
	Component 1 : Size = 1 node
PR	0	0	0	33
Thr 4 (Dp = 0.20)
	Component 0 : Size = 6 nodes
PK	2	1	0	31
DP	2	1	0	17
JK	2	1	0	26
	Component 1 : Size = 1 node
PR	0	0	0	33
	Component 2 : Size = 1 nodes
DK	0	1	0	21
	Component 3 : Size = 1 nodes
NS	0	1	0	28
	Component 4 : Size = 1 nodes
NT	0	1	0	29
Thr 5 (Dp = 0.15)
	Component 0 : Size = 6 nodes
PK	1	0	0	31
JK	1	0	0	26
	Component 1 : Size = 1 node
PR	0	0	0	33
	Component 2 : Size = 1 nodes
DK	0	0	0	21
	Component 3 : Size = 1 nodes
NS	0	0	0	28
	Component 4 : Size = 1 nodes
NT	0	0	0	29
	Component 5 : Size = 1 nodes
DP	0	0	0	17
