# Supplementary material for: Gene flow and genetic structure of Bactrocera carambolae (Diptera, Tephritidae) among geographical differences and sister species, B. dorsalis, inferred from microsatellite DNA data
Source: Zookeys. 2015 Nov 26;(540):239–72. doi: 10.3897/zookeys.540.10058 (PMC4714072; doi:10.3897/zookeys.540.10058)
Supplement: Supplementary material 2 — Component data at the four successive thresholds used to illustrate Figure 5 [file zookeys-540-239-s002.xls]

## Sheet: Sheet1
Supplementary File 2: Table 2 Component data at the four successive thresholds used to illustrate
the structure of the subset of B. carambolae and B. dorsalis populations presented in Figure 5
The highest Betweenness-centrality is highlighed in blue.
Node	Degree	Clustering	betweeness	population size
Thr 1 (Dp = 1.20)
	Component 0 : Size = 12 nodes
BD	11	1	0	30
PR	11	1	0	33
DK	11	1	0	21
CM	11	1	0	14
WK	11	1	0	31
KS	11	1	0	10
RB	11	1	0	19
JK	11	1	0	26
PK	11	1	0	31
NS	11	1	0	28
NT	11	1	0	29
DP	11	1	0	17
Thr 2 (Dp = 0.55)
	Component 0 : Size = 12 nodes
BD	10	0.98	0.11	30
PR	2	1	0	33
DK	10	0.98	0.11	21
CM	10	0.98	0.11	14
WK	10	0.98	0.11	31
KS	9	1	0	10
RB	10	0.98	0.1	19
JK	11	0.82	4.61	26
PK	11	0.82	4.61	31
NS	9	1	0	28
NT	10	0.98	0.11	29
DP	10	0.98	0.11	17
Thr 3 (Dp = 0.50)
	Component 0 : Size = 11 nodes
BD	10	0.98	0.11	30
DK	10	0.98	0.11	21
CM	10	0.98	0.11	14
WK	10	0.98	0.11	31
KS	9	1	0	10
RB	10	0.98	0.11	19
JK	10	0.98	0.11	26
PK	10	0.98	0.11	31
NS	9	1	0	28
NT	10	0.98	0.11	29
DP	10	0.98	0.11	17
	Component 1 : Size = 1 node
PR	0	0	0	33
Thr 4 (Dp = 0.2045056)
	Component 0 : Size = 7 nodes
BD	1	0	0	30
WK	1	0	0	31
KS	1	0	0	10
JK	3	0.33	5	26
PK	2	1	0	31
NT	2	0	5	29
DP	4	0.17	11	17
	Component 1 : Size = 1 node
PR	0	0	0	33
	Component 2 : Size = 1 node
DK	0	0	0	21
	Component 3 : Size = 1 node
CM	0	0	0	14
	Component 4 : Size = 1 node
RB	0	0	0	19
	Component 5 : Size = 1 node
NS	0	0	0	28
Thr 5 (Dp = 0.195)
	Component 0 : Size = 4 nodes
BD	1	0	0	30
WK	2	1	0	31
KS	2	1	0	10
JK	3	0.33	2	26
	Component 1 : Size = 1 node
PR	0	0	0	33
	Component 2 : Size = 1 node
DK	0	0	0	21
	Component 3 : Size = 1 node
CM	0	0	0	14
	Component 4 : Size = 1 node
WK	1	0	0	31
	Component 5 : Size = 1 node
KS	1	0	0	10
	Component 6 : Size = 1 node
RB	0	0	0	19
	Component 7 : Size = 1 node
NS	0	0	0	28
	Component 8 : Size = 1 node
NT	2	0	5	29
Thr 6 (Dp = 0.15)
	Component 0 : Size = 2 nodes
PK	1	0	0	31
JK	1	0	0	26
	Component 1 : Size = 1 node
BD	0	0	0	30
	Component 2 : Size = 1 node
PR	0	0	0	33
	Component 3 : Size = 1 node
DK	0	0	0	21
	Component 4 : Size = 1 node
CM	0	0	0	21
	Component 5 : Size = 1 node
WK	0	0	0	21
	Component 6 : Size = 1 node
KS	0	0	0	21
	Component 7 : Size = 1 node
RB	0	0	0	21
	Component 8 : Size = 1 node
NS	0	0	0	28
	Component 9 : Size = 1 node
NT	0	0	0	29
	Component 10 : Size = 1 node
DP	0	0	0	17
